# Supplementary material for: Computational analysis of data from a genome-wide screening identifies new PARP1 functional interactors as potential therapeutic targets
Source: PubMed Central journal article supplement (PMC6505629; doi:10.18632/oncotarget.26812), 2019-04-12
Supplement: oncotarget-10-2722-s001.pdf [file oncotarget-10-2722-s001.pdf]

## **Computational analysis of data from a genome-wide screening identifies new *PARP1* functional interactors as potential therapeutic targets**

### **SUPPLEMENTARY MATERIALS**

**Supplementary Table 1: Identification of oncogenes and tumor suppressors by applying the 20/20 rule.**

**See Supplementary File 1**

**Supplementary Table 2: The identified genes are found associated with different types of cancer. Here, information about cancer type, gene description and relevant publications is reported.**

**See Supplementary File 2**

**Supplementary Table 3: Functional analysis showed that *PARP1* is related to all the identified genes.**

**See Supplementary File 3**

**Supplementary Table 4: Expression correlation values expressed as Pearson coefficient (p), cancer and genes analyzed are reported**

| CANCER   | CANDIDATE GENE |       |        |       |       |       |        |       |       |        |       |         |
|----------|----------------|-------|--------|-------|-------|-------|--------|-------|-------|--------|-------|---------|
|          | RIT1           | HERC3 | ENTPD6 | NCOR1 | RCOR1 | H1F0  | INCENP | PSAT1 | REXO1 | TALDO1 | ZFP36 | ZFP36L2 |
| breast   | 0.26           | -0.14 | -0.02  | 0.04  | 0.04  | 0.03  | 0.33   | 0.1   | -0.12 | -0.02  | -0.18 | -0.12   |
| liver    | 0.27           | -0.03 | 0.1    | 0.12  | 0.04  | -0.06 | 0.3    | 0.02  | 0.18  | 0.01   | -0.16 | -0.05   |
| ovarian  | 0.03           | -0.14 | -0.09  | 0.12  | 0.12  | 0.03  | 0.24   | 0.1   | -0.05 | -0.05  | -0.19 | 0.01    |
| prostate | 0.45           | 0.58  | 0.31   | 0.17  | 0.46  | 0.56  | 0.63   | 0.34  | 0.35  | 0.36   | -0.16 | -0.14   |
| sarcoma  | 0.19           | -0.13 | -0.13  | 0.04  | 0.1   | 0.29  | 0.27   | 0.05  | 0.11  | -0.09  | -0.18 | -0.18   |
| stomach  | 0.14           | -0.04 | 0.07   | 0.08  | 0.23  | -0.09 | 0.45   | 0.23  | 0.25  | 0.06   | -0.22 | 0.02    |
| uterine  | 0.26           | 0.06  | -0.15  | 0.18  | 0.3   | 0.09  | 0.36   | 0.1   | -0.27 | -0.04  | -0.12 | -0.04   |

0 < p < 0.3 weak direct correlation

0.3 ≤ p < 0.6 medium direct correlation

0.6 ≤ p < 0.9 high direct correlation

- 0.3 < p < 0 weak inverse correlation

- 0.6 < p ≤ - 0.3 medium inverse correlation

- 0.9 < p ≤ - 0.6 high inverse correlation

**Supplementary Table 5: Expression analysis with "expression atlas" database of selected genes, in cell lines representing cancer sensitive to PARP inhibition and not.** For breast cancer: double/triple negative breast cancer cell lines as sensitive and normal cancer as not sensitive, for ovarian cancer: high grade serous as sensitive and clear cancer cell as not sensitive. Data are shown as transcript per million (TPM) from different sources and a t-test for unpaired data has been performed between means of expression in the two different models.

**See Supplementary File 4**
